# Supplementary material for: Selective oxidation of cyclohexane over gold nanoparticles supported on mesoporous silica prepared in the presence of thioether functionality
Source: Royal Society of Chemistry journal article supplement (doi:10.1039/c0cy00025f), 2011-01-01
Supplement: c0cy00025f.pdf [file c0cy00025f.pdf]

## Supplemental Information

### Selective oxidation of cyclohexane over gold nanoparticles supported on mesoporous silica prepared in the presence of thioether functionality

Pingping Wu <sup>a, b</sup>, Zhigang Xiong <sup>a</sup>, Kian Ping Loh <sup>b, c</sup>, X. S. Zhao <sup>a, b\*</sup>

Table S1 Cyclohexane oxidation results on different gold catalysts

| Catalyst <sup>reference</sup>                      | Oxidant/<br>MPa     | Temperature<br>(K) | Reaction<br>time (h) | Conversion<br>(mol.%) | K/A oil<br>Selectivity<br>(mol.%) | TOF<br>(h <sup>-1</sup> ) |
|----------------------------------------------------|---------------------|--------------------|----------------------|-----------------------|-----------------------------------|---------------------------|
| Au/ ZSM-5 <sup>1</sup>                             | O <sub>2</sub> /1.0 | 423                | 4                    | 16.0                  | 92.0                              | 2242                      |
| Au/MCM-41 <sup>2</sup>                             | O <sub>2</sub> /1.0 | 423                | 6                    | 19.0                  | 94.0                              | 1907                      |
| Au/Al <sub>2</sub> O <sub>3</sub> <sup>3</sup>     | O <sub>2</sub> /1.5 | 423                | 3                    | 12.6                  | 88.0                              | 16136                     |
| Au/APS-SBA-15 <sup>4</sup>                         | O <sub>2</sub> /1.5 | 423                | 6                    | 21.0                  | 96.0                              | 661                       |
| Au/SH-SBA-15 <sup>4</sup>                          | O <sub>2</sub> /1.5 | 423                | 6                    | 32.0                  | 94.0                              | 858                       |
| Au/TiO <sub>2</sub> /SiO <sub>2</sub> <sup>5</sup> | O <sub>2</sub> /1.0 | 423                | 3                    | 8.4                   | 91.7                              | 40133                     |

#### References:

1. R. Zhao, D. Ji, G. M. Lv, G. Qian, L. Yan, X. L. Wang and J. S. Suo, *Chem. Commun.*, 2004, 904-905.
2. G. M. Lu, R. Zhao, G. Qian, Y. X. Qi, X. L. Wang and J. S. Suo, *Catal. Lett.*, 2004, **97**, 115-118.
3. L. X. Xu, C. H. He, M. Q. Zhu and S. Fang, *Catal. Lett.*, 2007, **114**, 202-205.
4. K. K. Zhu, J. C. Hu and R. Richards, *Catal. Lett.*, 2005, **100**, 195-199.
5. L. X. Xu, C. H. He, M. Q. Zhu, K. J. Wu and Y. L. Lai, *Catal. Lett.*, 2007, **118**, 248-253.
